# Supplementary material
Source: PubMed Central journal article supplement (PMC4037398)
Supplement: NIHMS557541-supplement-01.pdf [file NIHMS557541-supplement-01.pdf]

## Reductions in Brain 5-HT<sub>1B</sub> Receptor Availability in Primarily Cocaine-Dependent Humans

### Supplemental Information

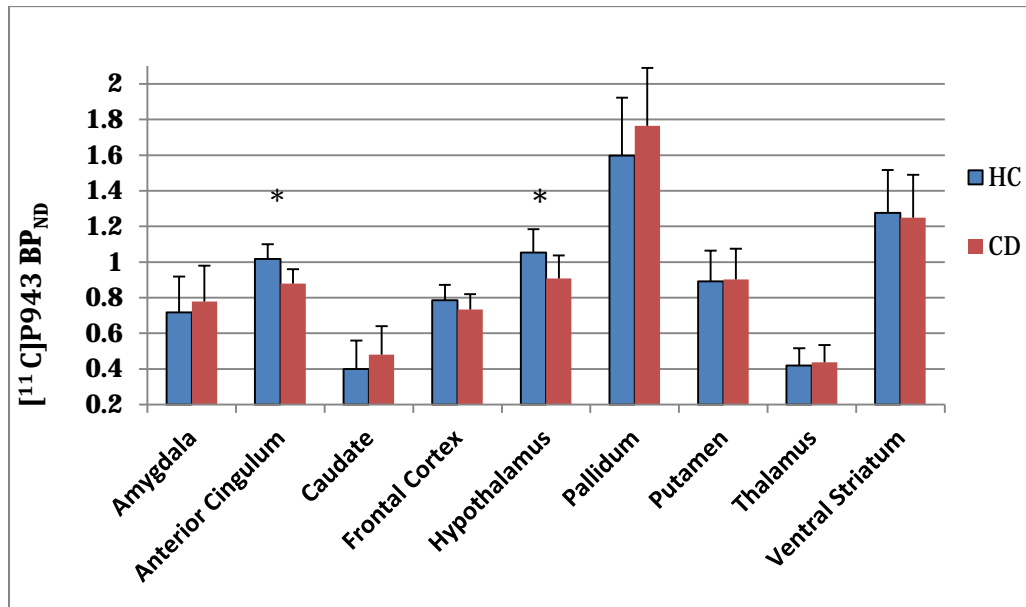

**Figure S1.** Initial (before gray matter masking) MRTM2 region of interest analysis depicting mean [<sup>11</sup>C]P943 regional binding potential (BP<sub>ND</sub>) values for healthy control (HC; blue) and cocaine-dependent (CD; red) subjects. Asterisks are significant at  $p < 0.01$  for the anterior cingulate and  $p = 0.03$  for the hypothalamus. The frontal cortex showed trend reductions ( $p = 0.08$ ). Error bars denote standard deviations.

**Table S1.** Reductions in gray-matter volume in CD identified by voxel-based morphometry. The results shown are the  $t$ -test statistics for CD < HC ( $t$ -score > 3.0, threshold at  $p = 0.05$ , corrected for multiple comparisons).

| Cluster Size<br>(voxels) | Z-value | MNI Coordinate (mm) |    |     | Side | BA | Identified Brain Region |
|--------------------------|---------|---------------------|----|-----|------|----|-------------------------|
|                          |         | x                   | y  | z   |      |    |                         |
| 598                      | 2.51    | 40                  | 34 | -4  | R    | 47 | Inferior Frontal Gyrus  |
| 89                       | 1.91    | -34                 | 22 | -10 | L    | 47 | Inferior Frontal Gyrus  |
| 58                       | 1.94    | 16                  | 60 | 20  | R    | 10 | Superior Frontal Gyrus  |

BA, Brodmann area; CD, cocaine-dependent subjects; HC, healthy control subjects; L, left; MNI, Montreal Neurological Institute; R, right.

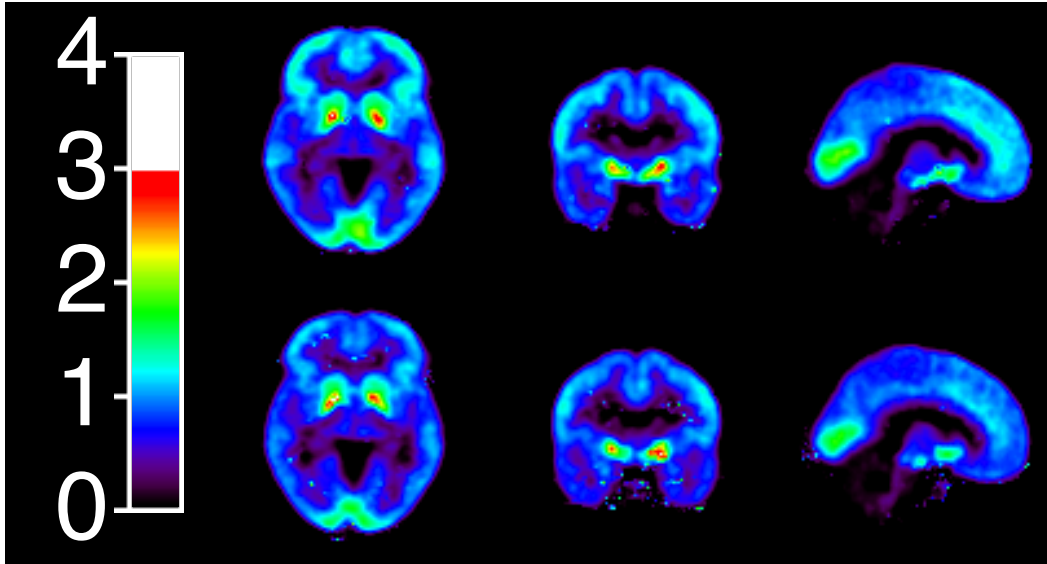

**Figure S2.** Averaged whole brain parametric positron emission tomography images for healthy control subjects (top row) and cocaine-dependent subjects (bottom row). Scale bar on left denotes  $[^{11}\text{C}]943$  regional binding potential.

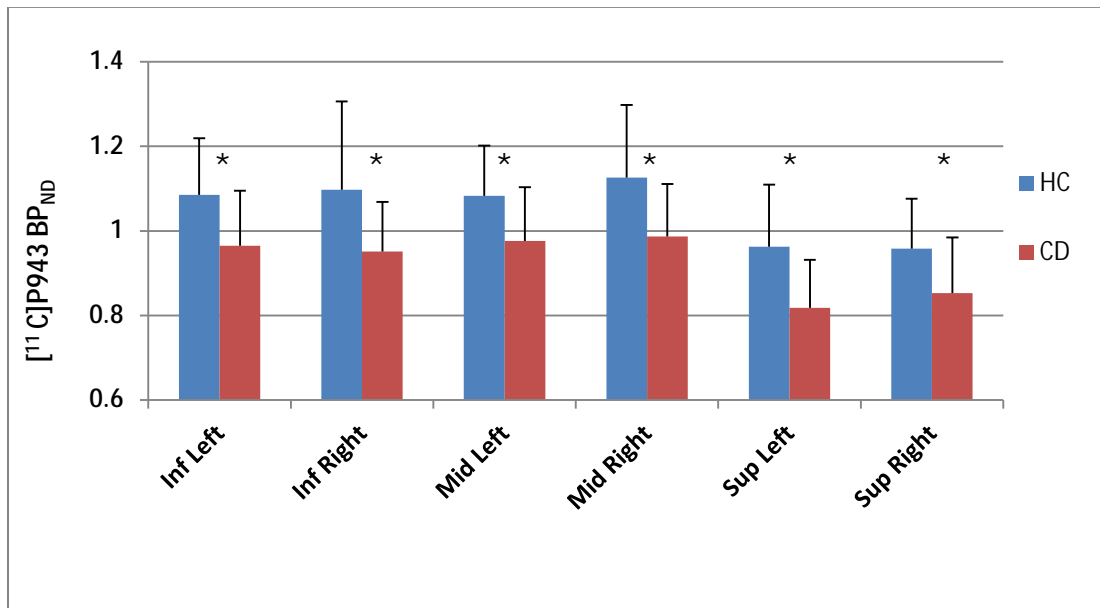

**Figure S3.** Gray matter masked analysis (mean  $[^{11}\text{C}]943$  regional binding potential ( $\text{BP}_{\text{ND}}$ ) values) in frontal subregions for healthy control (HC; blue) and cocaine-dependent (CD; red) subjects. Asterisks shown for all subregions were significant at  $p = 0.05$  or better. Error bars denote standard deviations. Inf, inferior; Mid, middle; Sup, superior.
